# Supplementary material for: Cu(ii) 3,5-diiodosalicylate complexes: precursor-dependent formation of mono-, di-, tri- and tetranuclear compounds and 1D coordination polymers
Source: Royal Society of Chemistry journal article supplement (doi:10.1039/d2ce01393b), 2022-11-22
Supplement: d2ce01393b1.pdf [file d2ce01393b1.pdf]

## S-1

### Cu(II) 3,5-diiodosalicylate complexes: precursor-dependent formation of mono-, di-, tri- and tetranuclear compounds and 1D coordination polymers

Mikhail A. Bondarenko, Pavel A. Abramov, Ilya V. Korolkov, Artem S. Bogomyakov, Maxim N. Sokolov and Sergey A. Adonin

**Table S1. Experimental details of XRD**

|                                    | 1                                                                              | 2                                                                              | 3                                                                              | 4                                                                                                      | 5                                                                                | 6                                                                                | 7                                                                                                               |
|------------------------------------|--------------------------------------------------------------------------------|--------------------------------------------------------------------------------|--------------------------------------------------------------------------------|--------------------------------------------------------------------------------------------------------|----------------------------------------------------------------------------------|----------------------------------------------------------------------------------|-----------------------------------------------------------------------------------------------------------------|
| Chemical formula                   | C <sub>26</sub> H <sub>20</sub> CuI <sub>4</sub> N <sub>2</sub> O <sub>6</sub> | C <sub>26</sub> H <sub>20</sub> CuI <sub>4</sub> N <sub>2</sub> O <sub>6</sub> | C <sub>24</sub> H <sub>16</sub> CuI <sub>4</sub> N <sub>2</sub> O <sub>6</sub> | C <sub>37.60</sub> H <sub>21.20</sub> Cu <sub>2</sub> I <sub>8</sub> N <sub>4.80</sub> O <sub>12</sub> | C <sub>19</sub> H <sub>17</sub> ClCuI <sub>2</sub> N <sub>2</sub> O <sub>3</sub> | C <sub>21</sub> H <sub>21</sub> ClCuI <sub>2</sub> N <sub>2</sub> O <sub>3</sub> | C <sub>50</sub> H <sub>47.80</sub> Cl <sub>4</sub> Cu <sub>3</sub> I <sub>4</sub> N <sub>6</sub> O <sub>6</sub> |
| <i>M<sub>r</sub></i>               | 1027.58                                                                        | 1027.58                                                                        | 999.53                                                                         | 1874.47                                                                                                | 674.14                                                                           | 702.19                                                                           | 1668.76                                                                                                         |
| Crystal system, space group        | Monoclinic, <i>P</i> 2 <sub>1</sub> / <i>n</i>                                 | Monoclinic, <i>P</i> 2 <sub>1</sub> / <i>c</i>                                 | Triclinic, <i>P</i> <sup>-</sup> 1                                             | Tetragonal, <i>P</i> 4/ <i>mnc</i>                                                                     | Triclinic, <i>P</i> <sup>-</sup> 1                                               | Triclinic, <i>P</i> <sup>-</sup> 1                                               | Triclinic, <i>P</i> <sup>-</sup> 1                                                                              |
| Temperature (K)                    | 140                                                                            | 140                                                                            | 140                                                                            | 140                                                                                                    | 150                                                                              | 142                                                                              | 150                                                                                                             |
| <i>a</i> , <i>b</i> , <i>c</i> (Å) | 9.6199 (7),<br>9.1882 (5),<br>17.4611 (11)                                     | 24.6536 (8),<br>13.7854 (5),<br>8.6860 (3)                                     | 7.8509 (3),<br>8.4157 (5),<br>10.9695 (6)                                      | 11.0664 (6),<br>11.0664 (6),<br>23.521 (2)                                                             | 9.0941 (4),<br>11.1084 (4),<br>11.1815 (4)                                       | 9.3176 (3),<br>11.6974 (4),<br>11.8686 (4)                                       | 8.5657 (2),<br>11.8674 (2),<br>13.5591 (3)                                                                      |
| <i>α</i> , <i>β</i> , <i>γ</i> (°) | 90, 104.355 (8),<br>90                                                         | 90, 91.111 (3),<br>90                                                          | 79.902 (5),<br>77.108 (4),<br>87.265 (4)                                       | 90, 90, 90                                                                                             | 102.305 (3),<br>103.773 (3),<br>94.247 (3)                                       | 73.151 (3),<br>71.895 (3),<br>89.946 (3)                                         | 89.250 (1),<br>85.618 (1),<br>89.773 (1)                                                                        |
| <i>V</i> (Å <sup>3</sup> )         | 1495.19 (17)                                                                   | 2951.47 (18)                                                                   | 695.52 (6)                                                                     | 2880.6 (4)                                                                                             | 1062.57 (7)                                                                      | 1171.09 (7)                                                                      | 1374.16 (5)                                                                                                     |
| <i>Z</i>                           | 2                                                                              | 4                                                                              | 1                                                                              | 2                                                                                                      | 2                                                                                | 2                                                                                | 1                                                                                                               |
| <i>μ</i> (mm <sup>-1</sup> )       | 4.90                                                                           | 4.97                                                                           | 5.27                                                                           | 5.08                                                                                                   | 4.08                                                                             | 3.71                                                                             | 3.65                                                                                                            |
| Crystal size (mm)                  | 0.50 × 0.20 ×<br>0.20                                                          | 0.10 × 0.10 ×<br>0.10                                                          | 0.20 × 0.10 ×<br>0.10                                                          | 0.30 × 0.20 ×<br>0.20                                                                                  | 0.30 × 0.20 ×<br>0.10                                                            | 0.40 × 0.20 ×<br>0.20                                                            | 0.22 × 0.18 ×<br>0.17                                                                                           |
| Diffractometer                     | New Xcalibur,<br>AtlasS2                                                       | New Xcalibur,<br>AtlasS2                                                       | New Xcalibur,<br>AtlasS2                                                       | New Xcalibur,<br>AtlasS2                                                                               | New Xcalibur,<br>AtlasS2                                                         | New Xcalibur,<br>AtlasS2                                                         | Bruker D8<br>Venture<br>diffractometer                                                                          |

|                                                                                     |                                                                                                                                                                                                                                 |                                                                                                                                                                                                                                 |                                                                                                                                                                                                                                 |                                                                                                                                                                                                                                 |                                                                                                                                                                                                                                 |                                                                                                                                                                                                                                 |                                                                                                                                                       |
|-------------------------------------------------------------------------------------|---------------------------------------------------------------------------------------------------------------------------------------------------------------------------------------------------------------------------------|---------------------------------------------------------------------------------------------------------------------------------------------------------------------------------------------------------------------------------|---------------------------------------------------------------------------------------------------------------------------------------------------------------------------------------------------------------------------------|---------------------------------------------------------------------------------------------------------------------------------------------------------------------------------------------------------------------------------|---------------------------------------------------------------------------------------------------------------------------------------------------------------------------------------------------------------------------------|---------------------------------------------------------------------------------------------------------------------------------------------------------------------------------------------------------------------------------|-------------------------------------------------------------------------------------------------------------------------------------------------------|
| Absorption correction                                                               | Multi-scan<br><i>CrysAlis PRO</i><br>1.171.38.41<br>(Rigaku Oxford<br>Diffraction,<br>2015) Empirical<br>absorption<br>correction using<br>spherical<br>harmonics,<br>implemented in<br>SCALE3 ABSPACK<br>scaling<br>algorithm. | Multi-scan<br><i>SADABS 2016/2:</i><br>Krause, L.,<br>Herbst-Irmer, R.,<br>Sheldrick G.M. &<br>Stalke D., J.<br><i>Appl. Cryst.</i> 48<br>(2015) 3-10 |
| $T_{\min}, T_{\max}$                                                                | 0.558, 1.000                                                                                                                                                                                                                    | 0.870, 1.000                                                                                                                                                                                                                    | 0.808, 1.000                                                                                                                                                                                                                    | 0.851, 1.000                                                                                                                                                                                                                    | 0.850, 1.000                                                                                                                                                                                                                    | 0.843, 1.000                                                                                                                                                                                                                    | 0.638, 0.746                                                                                                                                          |
| No. of measured,<br>independent and<br>observed [ $I > 2\sigma(I)$ ]<br>reflections | 6888, 3298,<br>2682                                                                                                                                                                                                             | 12427, 5588,<br>5025                                                                                                                                                                                                            | 5525, 3053,<br>2623                                                                                                                                                                                                             | 7099, 1745,<br>1330                                                                                                                                                                                                             | 7789, 4028,<br>3375                                                                                                                                                                                                             | 10249, 5184,<br>4267                                                                                                                                                                                                            | 25560, 8388,<br>7365                                                                                                                                  |
| $R_{\text{int}}$                                                                    | 0.032                                                                                                                                                                                                                           | 0.028                                                                                                                                                                                                                           | 0.026                                                                                                                                                                                                                           | 0.026                                                                                                                                                                                                                           | 0.026                                                                                                                                                                                                                           | 0.034                                                                                                                                                                                                                           | 0.026                                                                                                                                                 |
| $\theta$ values ( $^{\circ}$ )                                                      | $\theta_{\text{max}} = 29.0$ , $\theta_{\text{min}}$<br>= 2.2                                                                                                                                                                   | $\theta_{\text{max}} = 25.7$ , $\theta_{\text{min}}$<br>= 2.2                                                                                                                                                                   | $\theta_{\text{max}} = 29.0$ , $\theta_{\text{min}}$<br>= 2.5                                                                                                                                                                   | $\theta_{\text{max}} = 28.9$ , $\theta_{\text{min}}$<br>= 2.6                                                                                                                                                                   | $\theta_{\text{max}} = 25.7$ , $\theta_{\text{min}}$<br>= 1.9                                                                                                                                                                   | $\theta_{\text{max}} = 29.0$ , $\theta_{\text{min}}$<br>= 1.9                                                                                                                                                                   | $\theta_{\text{max}} = 30.5$ , $\theta_{\text{min}}$<br>= 2.3                                                                                         |
| $(\sin \theta / \lambda)_{\text{max}}$ ( $\text{\AA}^{-1}$ )                        | 0.682                                                                                                                                                                                                                           | 0.610                                                                                                                                                                                                                           | 0.682                                                                                                                                                                                                                           | 0.680                                                                                                                                                                                                                           | 0.610                                                                                                                                                                                                                           | 0.683                                                                                                                                                                                                                           | 0.715                                                                                                                                                 |
| Range of $h, k, l$                                                                  | $h = -9$ to $13$ , $k = -$<br>$12$ to $12$ , $l = -$<br>$23$ to $23$                                                                                                                                                            | $h = -26$ to $30$ , $k = -$<br>$16$ to $16$ , $l = -10$ to $7$                                                                                                                                                                  | $h = -9$ to $10$ , $k = -$<br>$9$ to $10$ , $l = -10$ to $14$                                                                                                                                                                   | $h = -14$ to $10$ , $k = -$<br>$7$ to $13$ , $l = -28$ to $31$                                                                                                                                                                  | $h = -11$ to $9$ , $k = -$<br>$13$ to $13$ , $l = -$<br>$13$ to $13$                                                                                                                                                            | $h = -11$ to $10$ , $k = -$<br>$11$ to $15$ , $l = -$<br>$14$ to $14$                                                                                                                                                           | $h = -12$ to $12$ , $k = -$<br>$16$ to $16$ , $l = -$<br>$19$ to $19$                                                                                 |
| $R[F^2 > 2\sigma(F^2)]$ , $wR(F^2)$ , $S$                                           | 0.040, 0.089,<br>1.05                                                                                                                                                                                                           | 0.069, 0.151,<br>1.20                                                                                                                                                                                                           | 0.031, 0.060,<br>1.03                                                                                                                                                                                                           | 0.054, 0.157,<br>1.09                                                                                                                                                                                                           | 0.040, 0.082,<br>1.03                                                                                                                                                                                                           | 0.035, 0.072,<br>1.01                                                                                                                                                                                                           | 0.023, 0.054,<br>1.06                                                                                                                                 |
| No. of reflections,<br>parameters, restraints                                       | 3298, 174, 0                                                                                                                                                                                                                    | 5588, 355, 0                                                                                                                                                                                                                    | 3053, 172, 0                                                                                                                                                                                                                    | 1745, 100, 2                                                                                                                                                                                                                    | 4028, 254, 0                                                                                                                                                                                                                    | 5184, 272, 0                                                                                                                                                                                                                    | 8388, 338, 1                                                                                                                                          |
| H-atom treatment                                                                    | H atoms treated<br>by a mixture of                                                                                                                                                                                              | H-atom<br>parameters                                                                                                                                                                                                            | H atoms treated<br>by a mixture of                                                                                                                                                                                              | H atoms treated<br>by a mixture of                                                                                                                                                                                              | H-atom<br>parameters                                                                                                                                                                                                            | H-atom<br>parameters                                                                                                                                                                                                            | H atoms treated<br>by a mixture of                                                                                                                    |

|                                                     | independent and constrained refinement                                             | constrained                                                                           | independent and constrained refinement                                    | independent and constrained refinement                                               | constrained                                                                         | constrained                                                               | independent and constrained refinement                                              |
|-----------------------------------------------------|------------------------------------------------------------------------------------|---------------------------------------------------------------------------------------|---------------------------------------------------------------------------|--------------------------------------------------------------------------------------|-------------------------------------------------------------------------------------|---------------------------------------------------------------------------|-------------------------------------------------------------------------------------|
|                                                     | $w = 1/[\sigma^2(F_o^2) + (0.035P)^2 + 0.9211P]$<br>where $P = (F_o^2 + 2F_c^2)/3$ | $w = 1/[\sigma^2(F_o^2) + (0.0061P)^2 + 111.3673P]$<br>where $P = (F_o^2 + 2F_c^2)/3$ | $w = 1/[\sigma^2(F_o^2) + (0.0189P)^2]$<br>where $P = (F_o^2 + 2F_c^2)/3$ | $w = 1/[\sigma^2(F_o^2) + (0.0625P)^2 + 21.0843P]$<br>where $P = (F_o^2 + 2F_c^2)/3$ | $w = 1/[\sigma^2(F_o^2) + (0.0234P)^2 + 3.2727P]$<br>where $P = (F_o^2 + 2F_c^2)/3$ | $w = 1/[\sigma^2(F_o^2) + (0.0244P)^2]$<br>where $P = (F_o^2 + 2F_c^2)/3$ | $w = 1/[\sigma^2(F_o^2) + (0.0222P)^2 + 0.3077P]$<br>where $P = (F_o^2 + 2F_c^2)/3$ |
| $\sigma_{\max}, \sigma_{\min}$ (e Å <sup>-3</sup> ) | 1.39, -1.44                                                                        | 3.53, -1.35                                                                           | 0.77, -1.19                                                               | 1.44, -1.56                                                                          | 1.88, -1.03                                                                         | 1.05, -1.15                                                               | 0.54, -0.49                                                                         |

|                             | 8                                                                                                                     | 9                                                                                             | 10                                                                                            | 11                                                                                            | 12                                                                                            | 13                                                              | 14                                                                             |
|-----------------------------|-----------------------------------------------------------------------------------------------------------------------|-----------------------------------------------------------------------------------------------|-----------------------------------------------------------------------------------------------|-----------------------------------------------------------------------------------------------|-----------------------------------------------------------------------------------------------|-----------------------------------------------------------------|--------------------------------------------------------------------------------|
| Chemical formula            | C <sub>37.33</sub> H <sub>40</sub> Cl <sub>2.67</sub> Cu <sub>2</sub> I <sub>2.67</sub> N <sub>4</sub> O <sub>4</sub> | C <sub>48</sub> H <sub>28</sub> Cu <sub>4</sub> I <sub>8</sub> N <sub>4</sub> O <sub>12</sub> | C <sub>52</sub> H <sub>36</sub> Cu <sub>4</sub> I <sub>8</sub> N <sub>4</sub> O <sub>12</sub> | C <sub>52</sub> H <sub>36</sub> Cu <sub>4</sub> I <sub>8</sub> N <sub>4</sub> O <sub>12</sub> | C <sub>56</sub> H <sub>44</sub> Cu <sub>4</sub> I <sub>8</sub> N <sub>4</sub> O <sub>12</sub> | C <sub>13</sub> H <sub>9</sub> CuI <sub>2</sub> NO <sub>3</sub> | C <sub>15</sub> H <sub>12</sub> CuI <sub>2</sub> N <sub>2</sub> O <sub>3</sub> |
| $M_r$                       | 1168.74                                                                                                               | 2122.10                                                                                       | 2178.21                                                                                       | 2178.21                                                                                       | 2234.31                                                                                       | 544.55                                                          | 585.61                                                                         |
| Crystal system, space group | Monoclinic, C2/c                                                                                                      | Tetragonal, I4 <sub>1</sub> /a                                                                | Monoclinic, P2 <sub>1</sub> /c                                  | Orthorhombic, P2 <sub>1</sub> 2 <sub>1</sub> 2 <sub>1</sub>                    |
| Temperature (K)             | 150                                                                                                                   | 150                                                                                           | 140                                                                                           | 150                                                                                           | 150                                                                                           | 150                                                             | 150                                                                            |
| $a, b, c$ (Å)               | 32.1635 (10),<br>7.9649 (2),<br>29.8771 (10)                                                                          | 16.9289 (4),<br>16.9289 (4),<br>19.3081 (6)                                                   | 17.3463 (3),<br>17.3463 (3),<br>19.8722 (5)                                                   | 17.7967 (6),<br>17.7967 (6),<br>19.2988 (9)                                                   | 17.7012 (4),<br>17.7012 (4),<br>20.5023 (8)                                                   | 9.9896 (5),<br>7.2980 (3),<br>20.0687 (10)                      | 5.2711 (7),<br>14.3697 (17),<br>23.766 (3)                                     |
| $\alpha, \beta, \gamma$ (°) | 90, 123.487 (5),<br>90                                                                                                | 90, 90, 90                                                                                    | 90, 90, 90                                                                                    | 90, 90, 90                                                                                    | 90, 90, 90                                                                                    | 90, 90.958 (2),<br>90                                           | 90, 90, 90                                                                     |
| $V$ (Å <sup>3</sup> )       | 6383.4 (5)                                                                                                            | 5533.5 (3)                                                                                    | 5979.4 (3)                                                                                    | 6112.4 (5)                                                                                    | 6424.0 (4)                                                                                    | 1462.89 (12)                                                    | 1800.1 (4)                                                                     |
| $Z$                         | 6                                                                                                                     | 4                                                                                             | 4                                                                                             | 4                                                                                             | 4                                                                                             | 4                                                               | 4                                                                              |
| $\rho$ (mm <sup>-1</sup> )  | 3.14                                                                                                                  | 6.04                                                                                          | 5.60                                                                                          | 5.47                                                                                          | 5.21                                                                                          | 5.72                                                            | 4.66                                                                           |
| Crystal size (mm)           | 0.30 × 0.10 ×<br>0.10                                                                                                 | 0.07 × 0.07 ×<br>0.06                                                                         | 0.30 × 0.20 ×<br>0.20                                                                         | 0.12 × 0.10 ×<br>0.08                                                                         | 0.16 × 0.06 ×<br>0.02                                                                         | 0.10 × 0.05 ×<br>0.05                                           | 0.11 × 0.08 ×<br>0.08                                                          |
| Diffractometer              | New Xcalibur,<br>AtlasS2                                                                                              | Bruker D8<br>Venture                                                                          | New Xcalibur,<br>AtlasS2                                                                      | Bruker D8<br>Venture                                                                          | Bruker D8<br>Venture                                                                          | Bruker D8<br>Venture                                            | Bruker D8<br>Venture                                                           |

|                                                                                     |                                                                                                                                                                                                                                 | diffractometer                                                                                                                                         |                                                                                                                                                                                                                                 | diffractometer                                                                                                                                         | diffractometer                                                                                                                                         | diffractometer                                                                                                                                         | diffractometer                                                                                                                                         |
|-------------------------------------------------------------------------------------|---------------------------------------------------------------------------------------------------------------------------------------------------------------------------------------------------------------------------------|--------------------------------------------------------------------------------------------------------------------------------------------------------|---------------------------------------------------------------------------------------------------------------------------------------------------------------------------------------------------------------------------------|--------------------------------------------------------------------------------------------------------------------------------------------------------|--------------------------------------------------------------------------------------------------------------------------------------------------------|--------------------------------------------------------------------------------------------------------------------------------------------------------|--------------------------------------------------------------------------------------------------------------------------------------------------------|
| Absorption correction                                                               | Multi-scan<br><i>CrysAlis PRO</i><br>1.171.38.41<br>(Rigaku Oxford<br>Diffraction,<br>2015) Empirical<br>absorption<br>correction using<br>spherical<br>harmonics,<br>implemented in<br>SCALE3 ABSPACK<br>scaling<br>algorithm. | Multi-scan<br><i>SADABS 2016/2</i> :<br>Krause, L.,<br>Herbst-Irmer, R.,<br>Sheldrick G.M. &<br>Stalke D., J.<br><i>Appl. Cryst.</i> 48<br>(2015) 3-10 | Multi-scan<br><i>CrysAlis PRO</i><br>1.171.38.41<br>(Rigaku Oxford<br>Diffraction,<br>2015) Empirical<br>absorption<br>correction using<br>spherical<br>harmonics,<br>implemented in<br>SCALE3 ABSPACK<br>scaling<br>algorithm. | Multi-scan<br><i>SADABS 2016/2</i> :<br>Krause, L.,<br>Herbst-Irmer, R.,<br>Sheldrick G.M. &<br>Stalke D., J.<br><i>Appl. Cryst.</i> 48<br>(2015) 3-10 | Multi-scan<br><i>SADABS 2016/2</i> :<br>Krause, L.,<br>Herbst-Irmer, R.,<br>Sheldrick G.M. &<br>Stalke D., J.<br><i>Appl. Cryst.</i> 48<br>(2015) 3-10 | Multi-scan<br><i>SADABS 2016/2</i> :<br>Krause, L.,<br>Herbst-Irmer, R.,<br>Sheldrick G.M. &<br>Stalke D., J.<br><i>Appl. Cryst.</i> 48<br>(2015) 3-10 | Multi-scan<br><i>SADABS 2016/2</i> :<br>Krause, L.,<br>Herbst-Irmer, R.,<br>Sheldrick G.M. &<br>Stalke D., J.<br><i>Appl. Cryst.</i> 48<br>(2015) 3-10 |
| $T_{\min}, T_{\max}$                                                                | 0.927, 1.000                                                                                                                                                                                                                    | 0.639, 0.746                                                                                                                                           | 0.933, 1.000                                                                                                                                                                                                                    | 0.540, 0.746                                                                                                                                           | 0.568, 0.746                                                                                                                                           | 0.606, 0.746                                                                                                                                           | 0.582, 0.745                                                                                                                                           |
| No. of measured,<br>independent and<br>observed [ $I > 2\sigma(I)$ ]<br>reflections | 22785, 6064,<br>5445                                                                                                                                                                                                            | 73022, 4601,<br>4149                                                                                                                                   | 12871, 2839,<br>2585                                                                                                                                                                                                            | 46730, 4683,<br>4011                                                                                                                                   | 33846, 4515,<br>3719                                                                                                                                   | 26748, 4490,<br>3804                                                                                                                                   | 14513, 2850,<br>2327                                                                                                                                   |
| $R_{\text{int}}$                                                                    | 0.021                                                                                                                                                                                                                           | 0.036                                                                                                                                                  | 0.024                                                                                                                                                                                                                           | 0.051                                                                                                                                                  | 0.031                                                                                                                                                  | 0.042                                                                                                                                                  | 0.102                                                                                                                                                  |
| $\theta$ values ( $^{\circ}$ )                                                      | $\theta_{\text{max}} = 25.7, \theta_{\text{min}} = 2.5$                                                                                                                                                                         | $\theta_{\text{max}} = 31.5, \theta_{\text{min}} = 2.4$                                                                                                | $\theta_{\text{max}} = 25.7, \theta_{\text{min}} = 2.4$                                                                                                                                                                         | $\theta_{\text{max}} = 30.5, \theta_{\text{min}} = 2.3$                                                                                                | $\theta_{\text{max}} = 29.6, \theta_{\text{min}} = 1.5$                                                                                                | $\theta_{\text{max}} = 30.6, \theta_{\text{min}} = 2.0$                                                                                                | $\theta_{\text{max}} = 24.4, \theta_{\text{min}} = 2.2$                                                                                                |
| $(\sin \theta/\lambda)_{\text{max}}$ ( $\text{\AA}^{-1}$ )                          | 0.610                                                                                                                                                                                                                           | 0.735                                                                                                                                                  | 0.610                                                                                                                                                                                                                           | 0.715                                                                                                                                                  | 0.695                                                                                                                                                  | 0.716                                                                                                                                                  | 0.582                                                                                                                                                  |
| Range of $h, k, l$                                                                  | $h = -38 \div 39, k = -9 \div 6, l = -36 \div 33$                                                                                                                                                                               | $h = -24 \div 24, k = -24 \div 24, l = -28 \div 28$                                                                                                    | $h = -21 \div 17, k = -21 \div 17, l = -23 \div 24$                                                                                                                                                                             | $h = -25 \div 25, k = -25 \div 25, l = -26 \div 27$                                                                                                    | $h = -21 \div 24, k = -21 \div 24, l = -27 \div 28$                                                                                                    | $h = -14 \div 14, k = -10 \div 10, l = -28 \div 28$                                                                                                    | $h = -6 \div 5, k = -16 \div 16, l = -27 \div 27$                                                                                                      |
| $R[F^2 > 2\sigma(F^2)], wR(F^2), S$                                                 | 0.035, 0.079,<br>1.05                                                                                                                                                                                                           | 0.026, 0.060,<br>1.08                                                                                                                                  | 0.062, 0.119,<br>1.16                                                                                                                                                                                                           | 0.033, 0.088,<br>1.02                                                                                                                                  | 0.035, 0.089,<br>1.18                                                                                                                                  | 0.052, 0.124,<br>1.17                                                                                                                                  | 0.041, 0.088,<br>0.95                                                                                                                                  |
| No. of reflections                                                                  | 6064                                                                                                                                                                                                                            | 4601                                                                                                                                                   | 2839                                                                                                                                                                                                                            | 4683                                                                                                                                                   | 4515                                                                                                                                                   | 4490                                                                                                                                                   | 2850                                                                                                                                                   |
| No. of parameters                                                                   | 359                                                                                                                                                                                                                             | 172                                                                                                                                                    | 181                                                                                                                                                                                                                             | 182                                                                                                                                                    | 190                                                                                                                                                    | 181                                                                                                                                                    | 208                                                                                                                                                    |

|                                                     |                                                                                      |                                                                                      |                                                                         |                                                                                      |                                                                                      |                                                                                      |                                                                                                                             |
|-----------------------------------------------------|--------------------------------------------------------------------------------------|--------------------------------------------------------------------------------------|-------------------------------------------------------------------------|--------------------------------------------------------------------------------------|--------------------------------------------------------------------------------------|--------------------------------------------------------------------------------------|-----------------------------------------------------------------------------------------------------------------------------|
| No. of restraints                                   | 0                                                                                    | 0                                                                                    | 0                                                                       | 0                                                                                    | 0                                                                                    | 0                                                                                    | 0                                                                                                                           |
| H-atom treatment                                    | H-atom parameters constrained                                                        | H-atom parameters constrained                                                        | H-atom parameters constrained                                           | H-atom parameters constrained                                                        | H-atom parameters constrained                                                        | H-atom parameters constrained                                                        | H-atom parameters constrained                                                                                               |
|                                                     | $w = 1/[\sigma^2(F_o^2) + (0.0252P)^2 + 47.3496P]$<br>where $P = (F_o^2 + 2F_c^2)/3$ | $w = 1/[\sigma^2(F_o^2) + (0.0199P)^2 + 22.4482P]$<br>where $P = (F_o^2 + 2F_c^2)/3$ | $w = 1/[\sigma^2(F_o^2) + 259.3857P]$<br>where $P = (F_o^2 + 2F_c^2)/3$ | $w = 1/[\sigma^2(F_o^2) + (0.0421P)^2 + 25.9649P]$<br>where $P = (F_o^2 + 2F_c^2)/3$ | $w = 1/[\sigma^2(F_o^2) + (0.0223P)^2 + 58.3205P]$<br>where $P = (F_o^2 + 2F_c^2)/3$ | $w = 1/[\sigma^2(F_o^2) + (0.0284P)^2 + 18.7285P]$<br>where $P = (F_o^2 + 2F_c^2)/3$ | $w = 1/[\sigma^2(F_o^2)]$<br>where $P = (F_o^2 + 2F_c^2)/3$                                                                 |
| $\sigma_{\max}, \sigma_{\min}$ (e Å <sup>-3</sup> ) | 2.88, -1.82                                                                          | 2.14, -1.36                                                                          | 2.72, -3.04                                                             | 2.78, -1.21                                                                          | 1.74, -0.88                                                                          | 3.79, -1.62                                                                          | 0.55, -0.57                                                                                                                 |
| Absolute structure                                  | –                                                                                    | ?                                                                                    | ?                                                                       | ?                                                                                    | ?                                                                                    | –                                                                                    | Flack x determined using 780 quotients [(1+)-(1-)]/[(1+)+(1-)] (Parsons, Flack and Wagner, Acta Cryst. B69 (2013) 249-259). |
| Absolute structure parameter                        | –                                                                                    | ?                                                                                    | ?                                                                       | ?                                                                                    | ?                                                                                    | –                                                                                    | 0.02 (5)                                                                                                                    |

Computer programs: *CrysAlis PRO* 1.171.38.41 (Rigaku OD, 2015), *APEX3* (Bruker-AXS, 2016), *SAINT* (Bruker-AXS, 2016), *SHELXS2014* (Sheldrick, 2014), *SHELXT* 2014/5 (Sheldrick, 2014), *SHELXL2014* (Sheldrick, 2014), *SHELXL2017/1* (Sheldrick, 2017), *ShelXle* (Hübschle, 2011), *CIFTAB-2014* (Sheldrick, 2014).

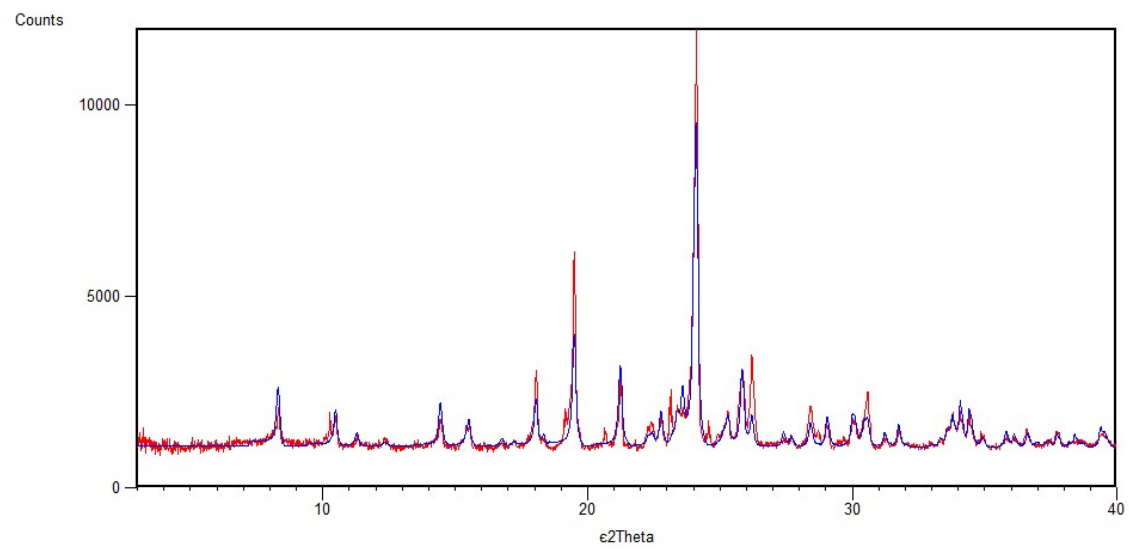

**Figure 1S.** Calculated and experimental PXRD patterns for **1**

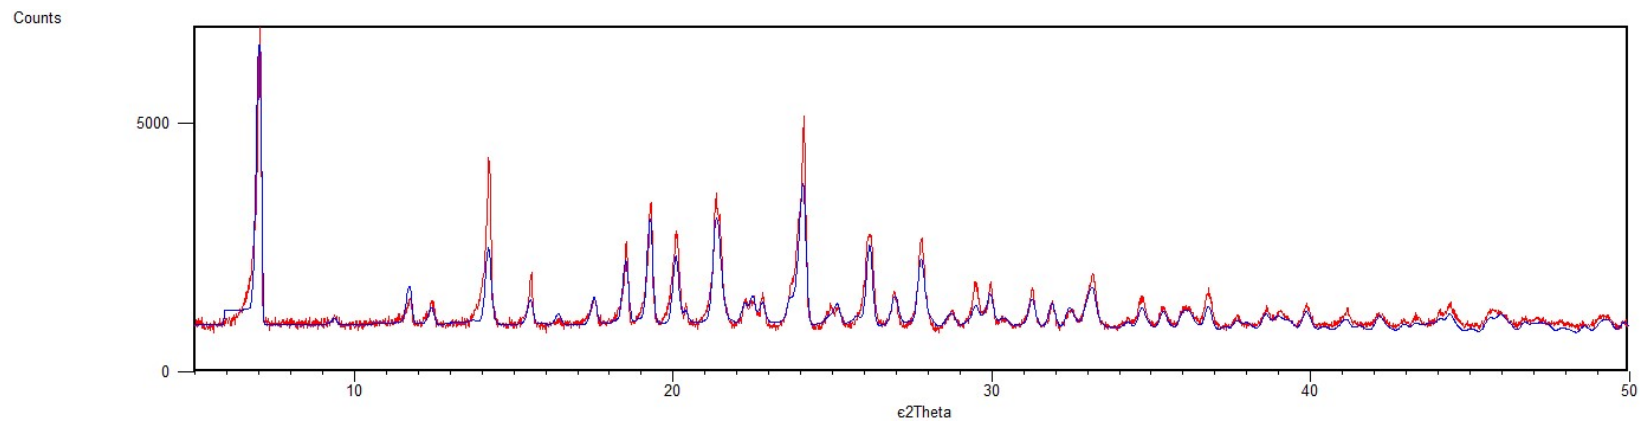

**Figure 2S.** Calculated and experimental PXRD patterns for **2**

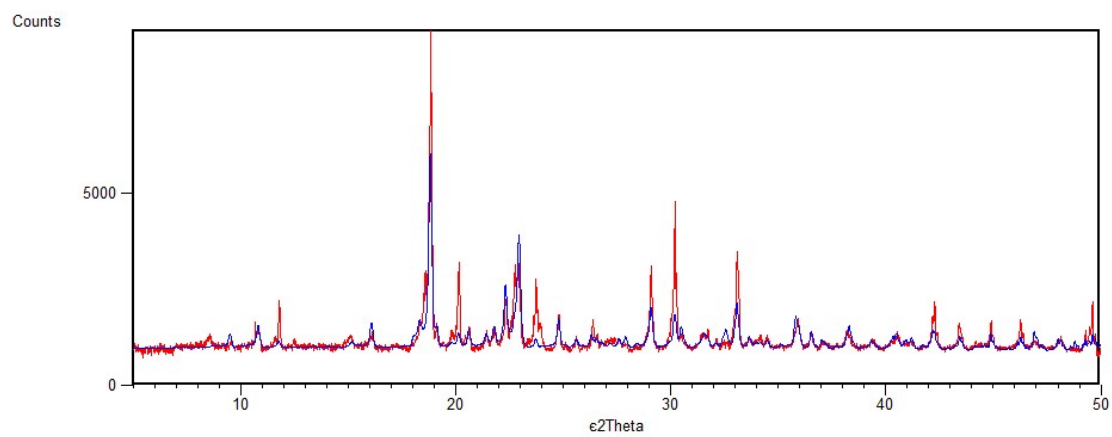

**Figure 3S.** Calculated and experimental PXRD patterns for **3**

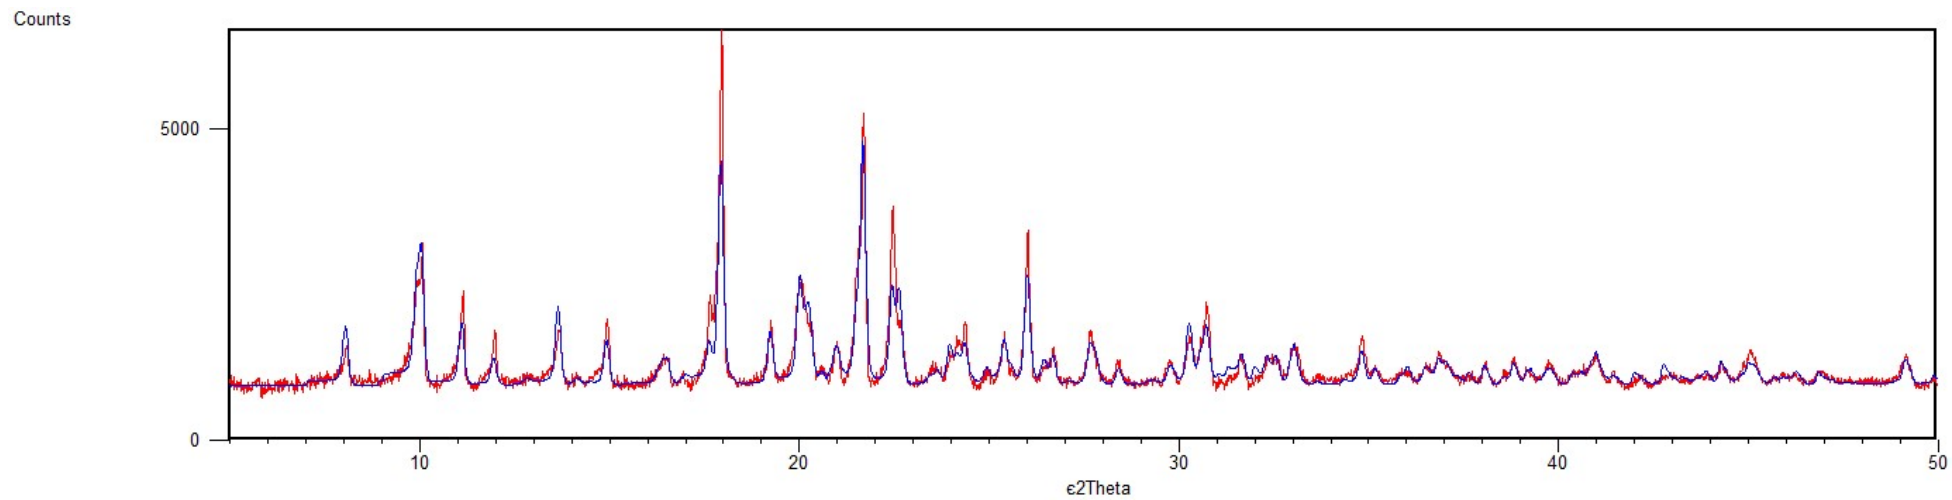

**Figure 4S.** Calculated and experimental PXRD patterns for **5**

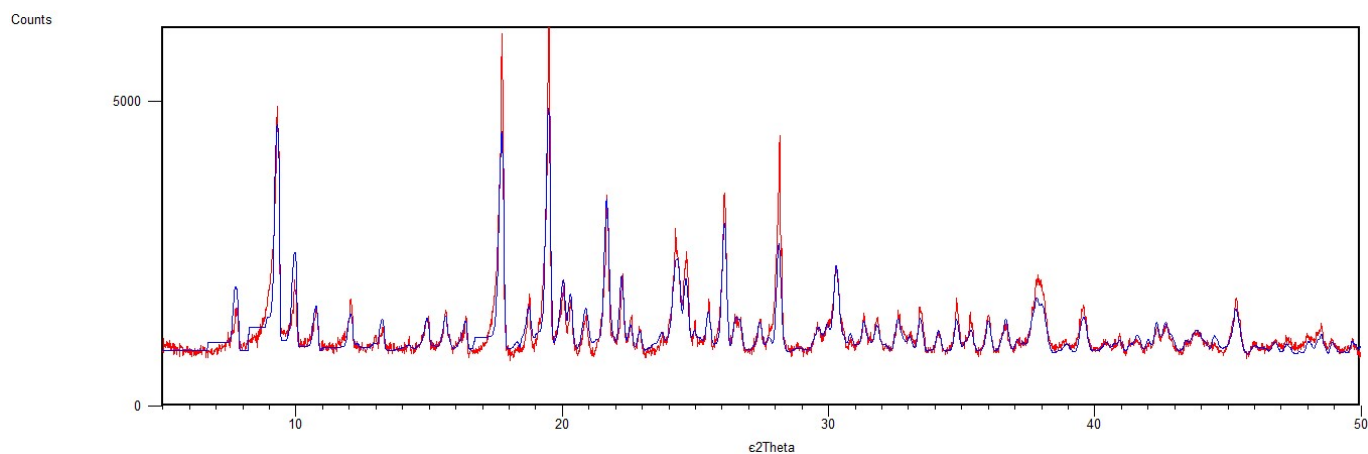

**Figure 5S.** Calculated and experimental PXRD patterns for **6**

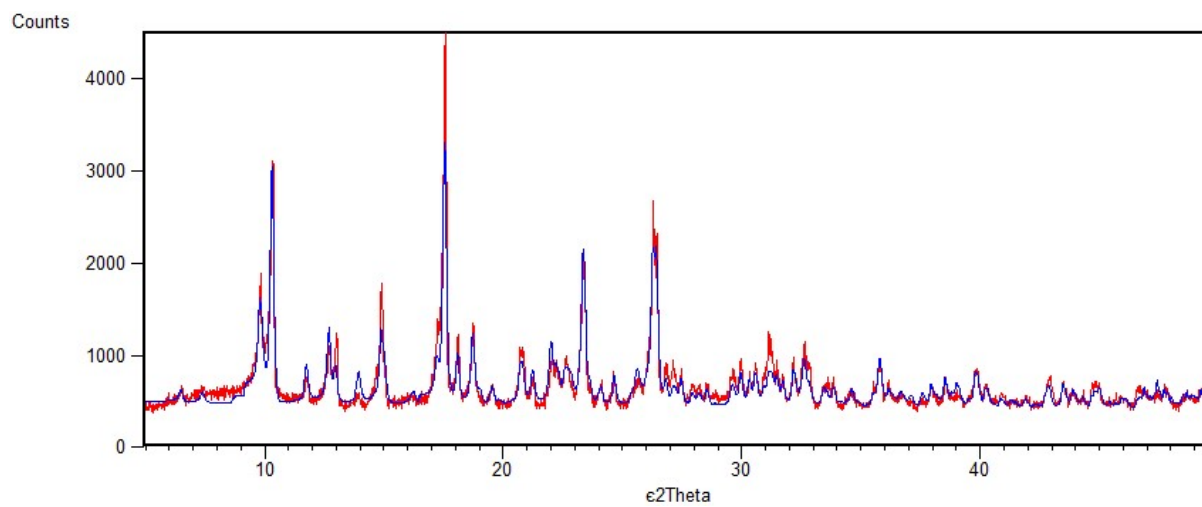

**Figure 6S.** Calculated and experimental PXRD patterns for **7**



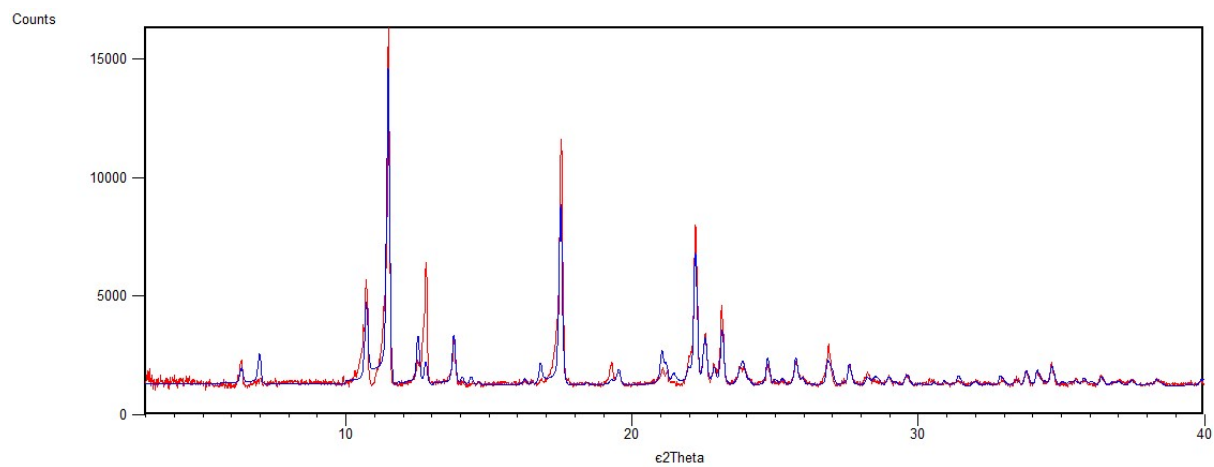

**Figure 7S.** Calculated and experimental PXRD patterns for **8**

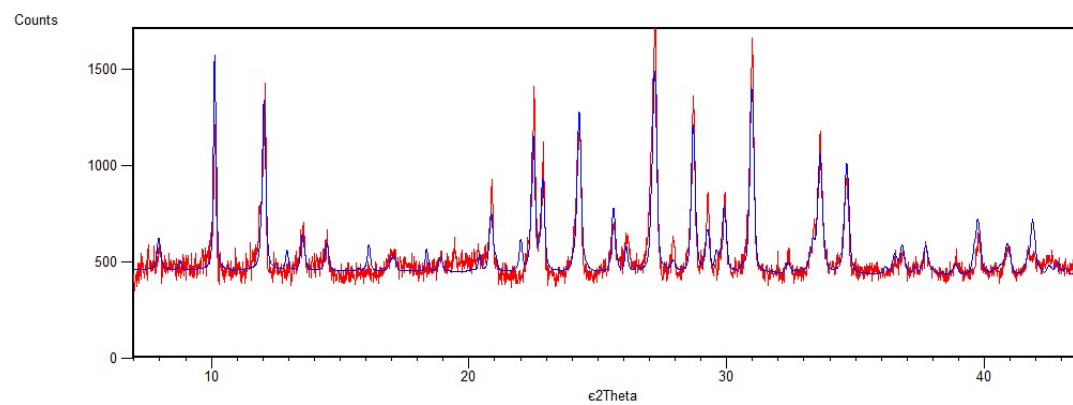

**Figure 8S.** Calculated and experimental PXRD patterns for **9**

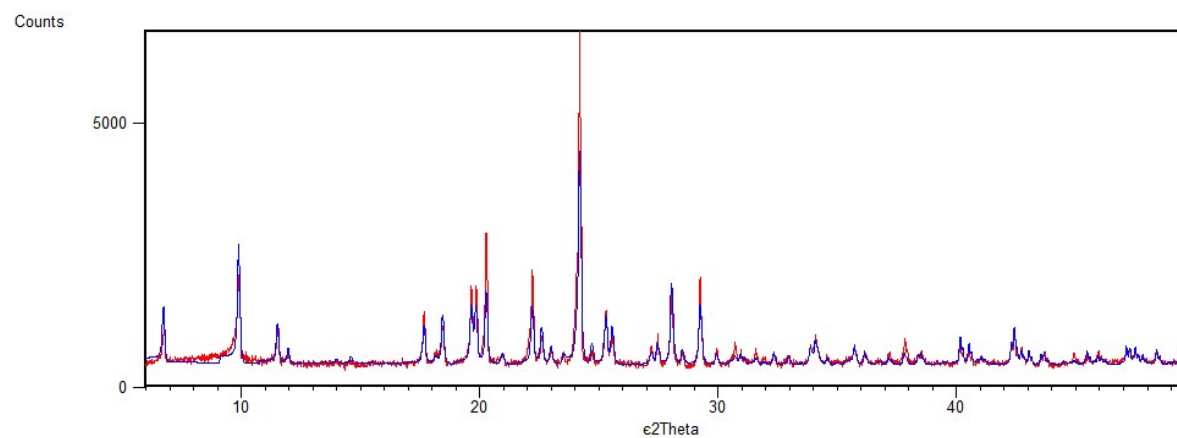

**Figure 9S.** Calculated and experimental PXRD patterns for **11**

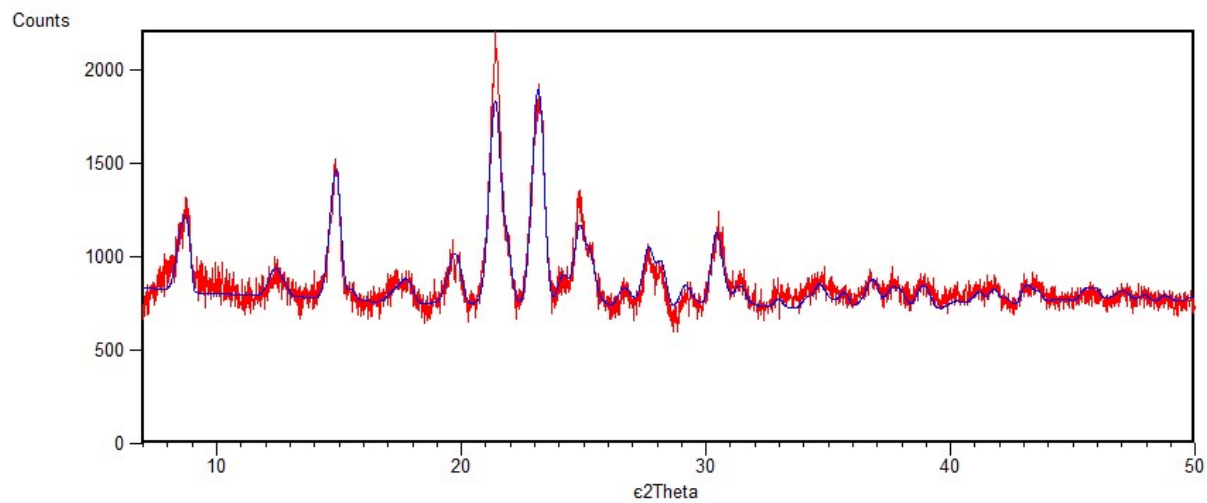

**Figure 10S.** Calculated and experimental PXRD patterns for **13**

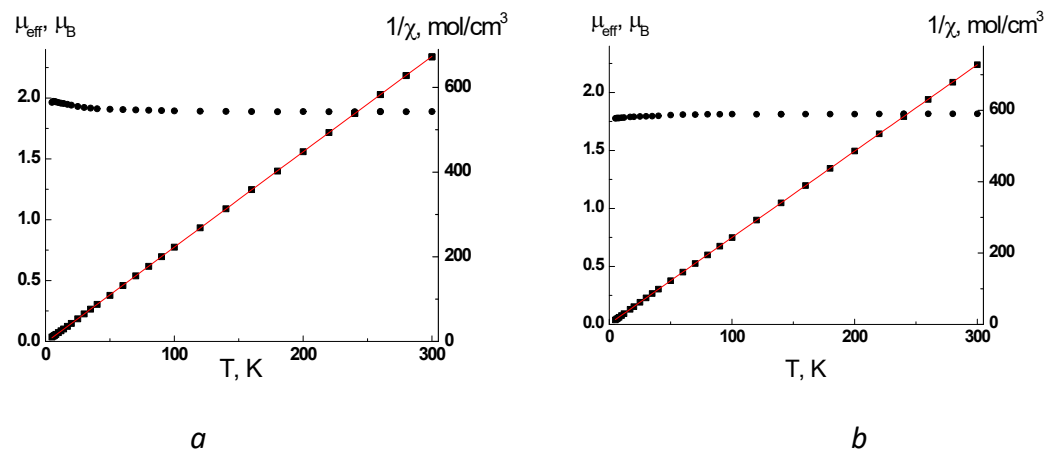

Figure 11S. Temperature dependencies of  $\mu_{\text{eff}}$  (●) and  $1/\chi$  (■) for the complexes 1 (a) and 2 (b). Solid lines are theoretical curves.

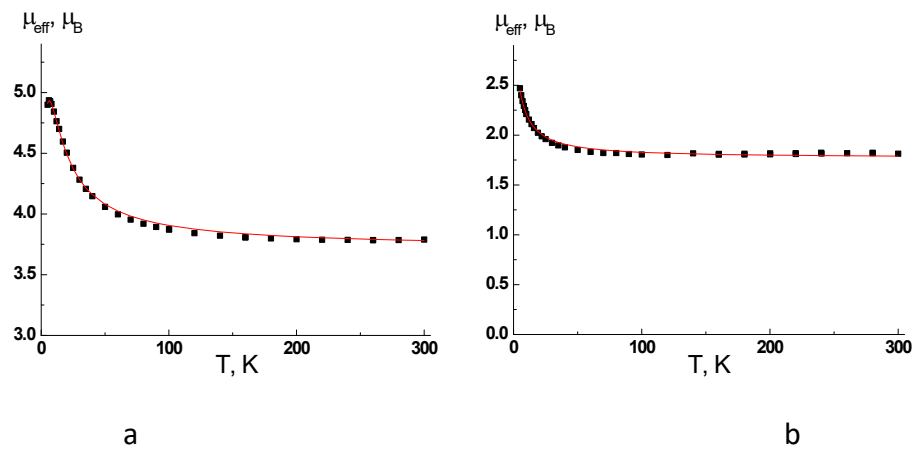

Figure 12S. Temperature dependencies of  $\mu_{\text{eff}}$  for the complexes 11 (a) and 13 (b). Solid lines are theoretical curves.

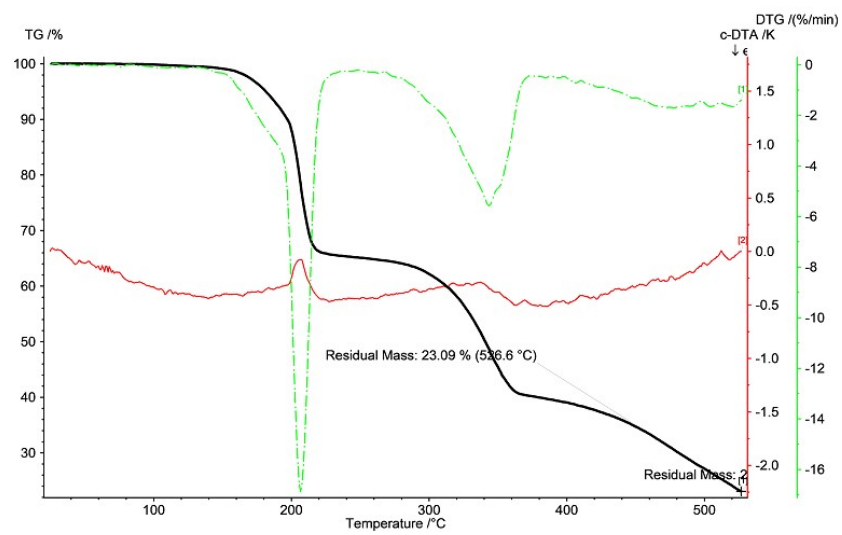

Figure 13S. TGA data for 2

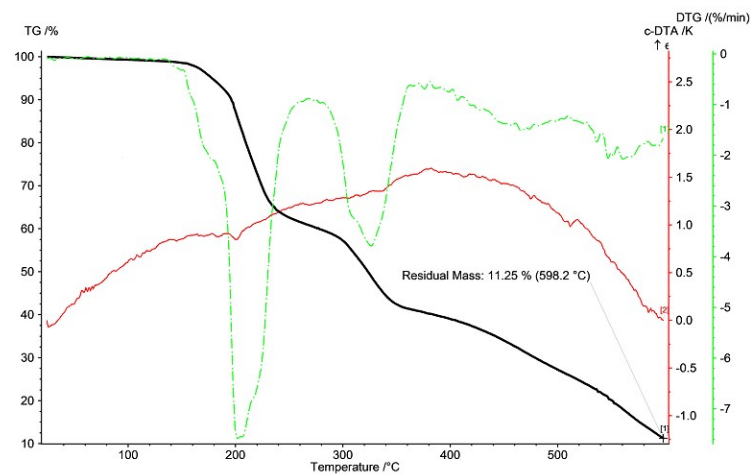

Figure 14S. TGA data for 3

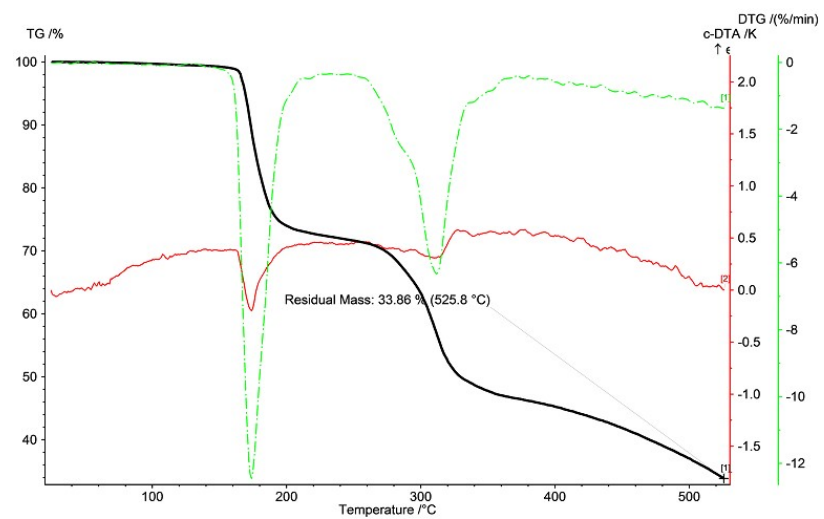

Figure 15S. TGA data for 5

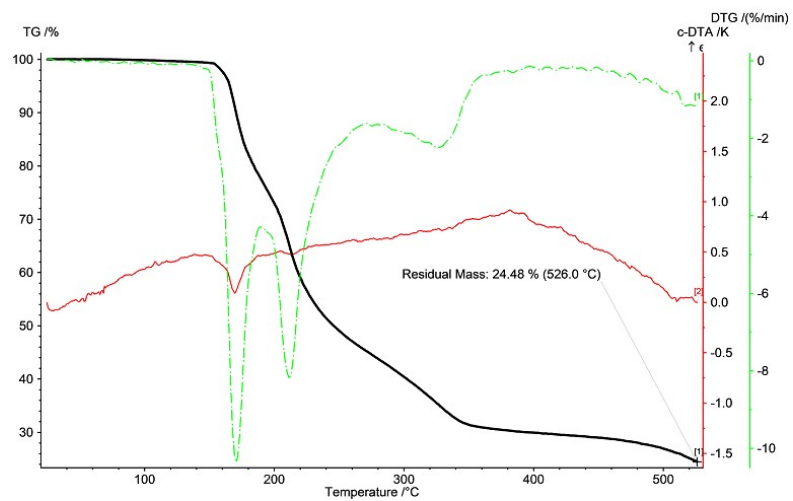

Figure 16S. TGA data for 6

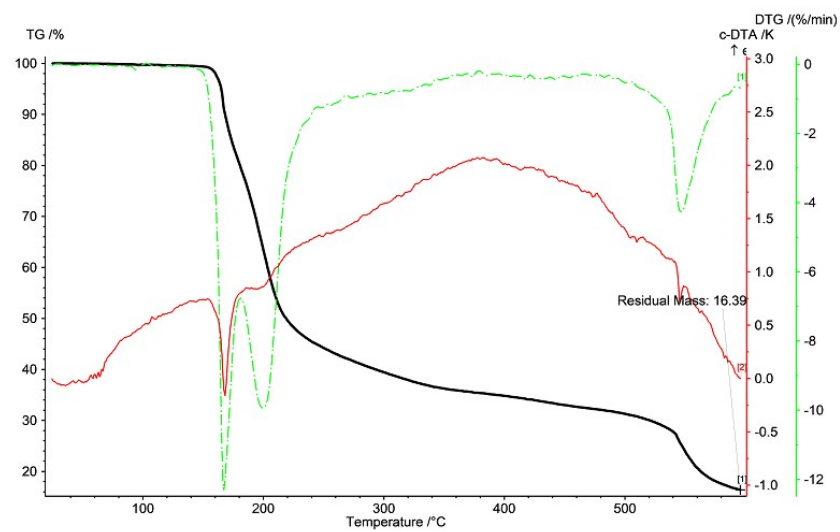

Figure 18S. TGA data for 8

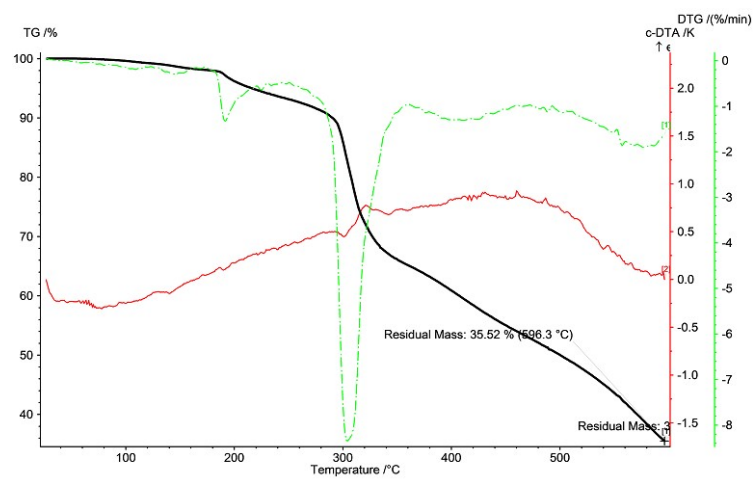

Figure 19S. TGA data for 9

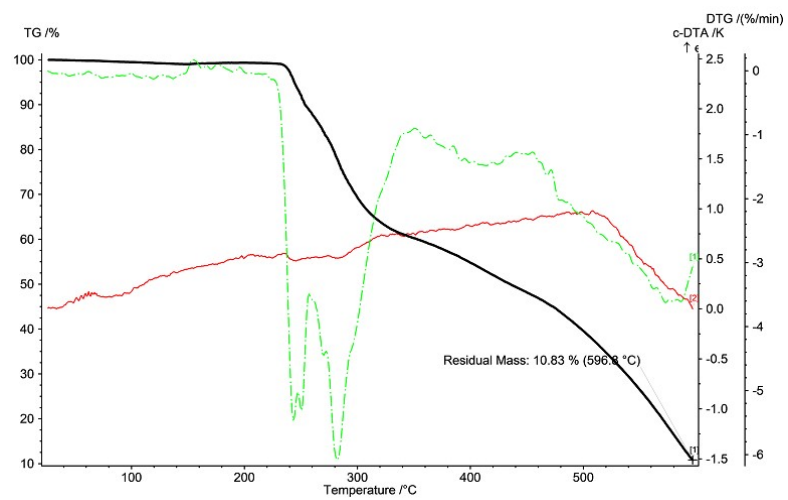

Figure 20S. TGA data for 11

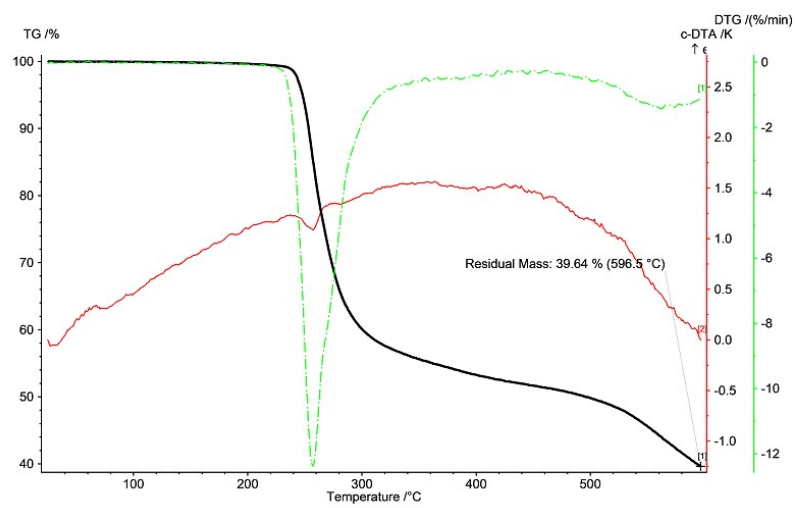

Figure 21S. TGA data for 12

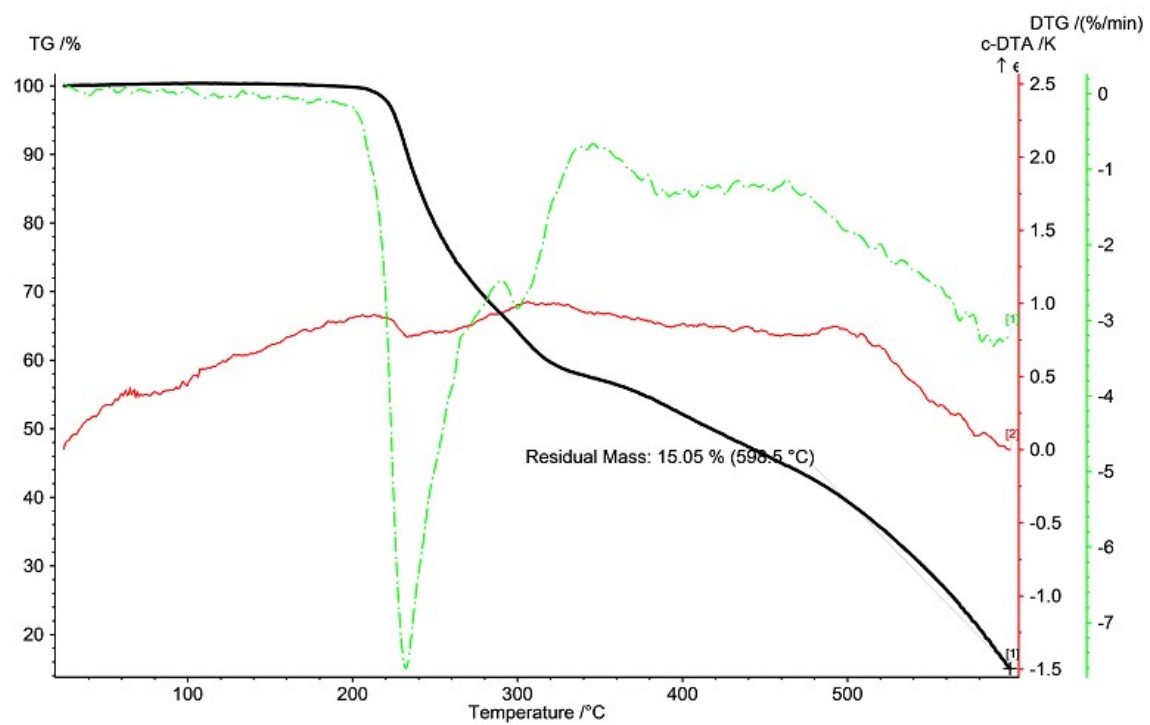

Figure 22S. TGA data for 13
